# Supplementary material for: Molecular Marker-Assisted Pyramiding of SCM3, Wx, and BADH2 Genes for the Development of High-Yield, Superior-Quality, and Lodging-Resistant Rice Varieties
Source: Research Square preprint supplement (doi:10.21203/rs.3.rs-6845239/v1), 2025-06-17
Supplement: Supplementary file 1 [file 2c04df5878000f3066453797.docx]

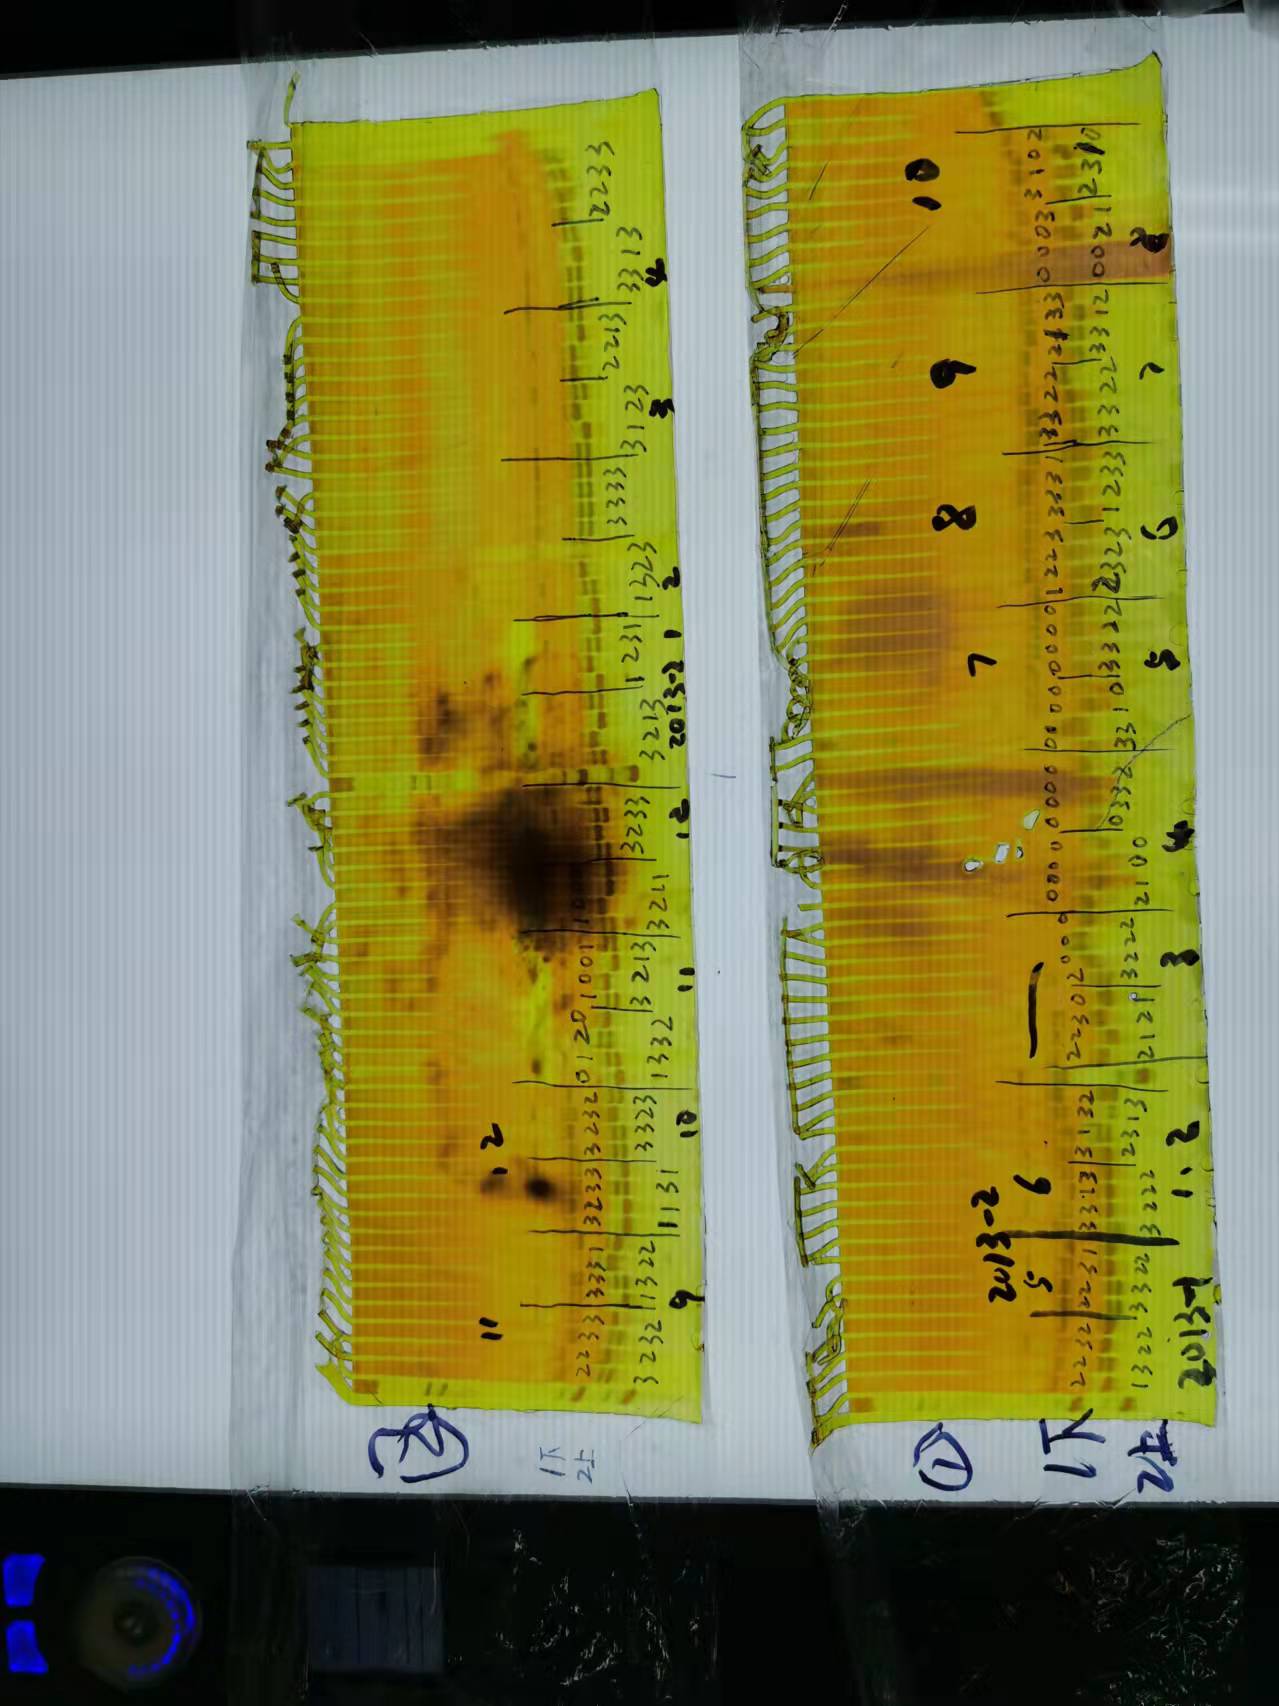


Fig1. SCM3indel-2 molecular marker gel


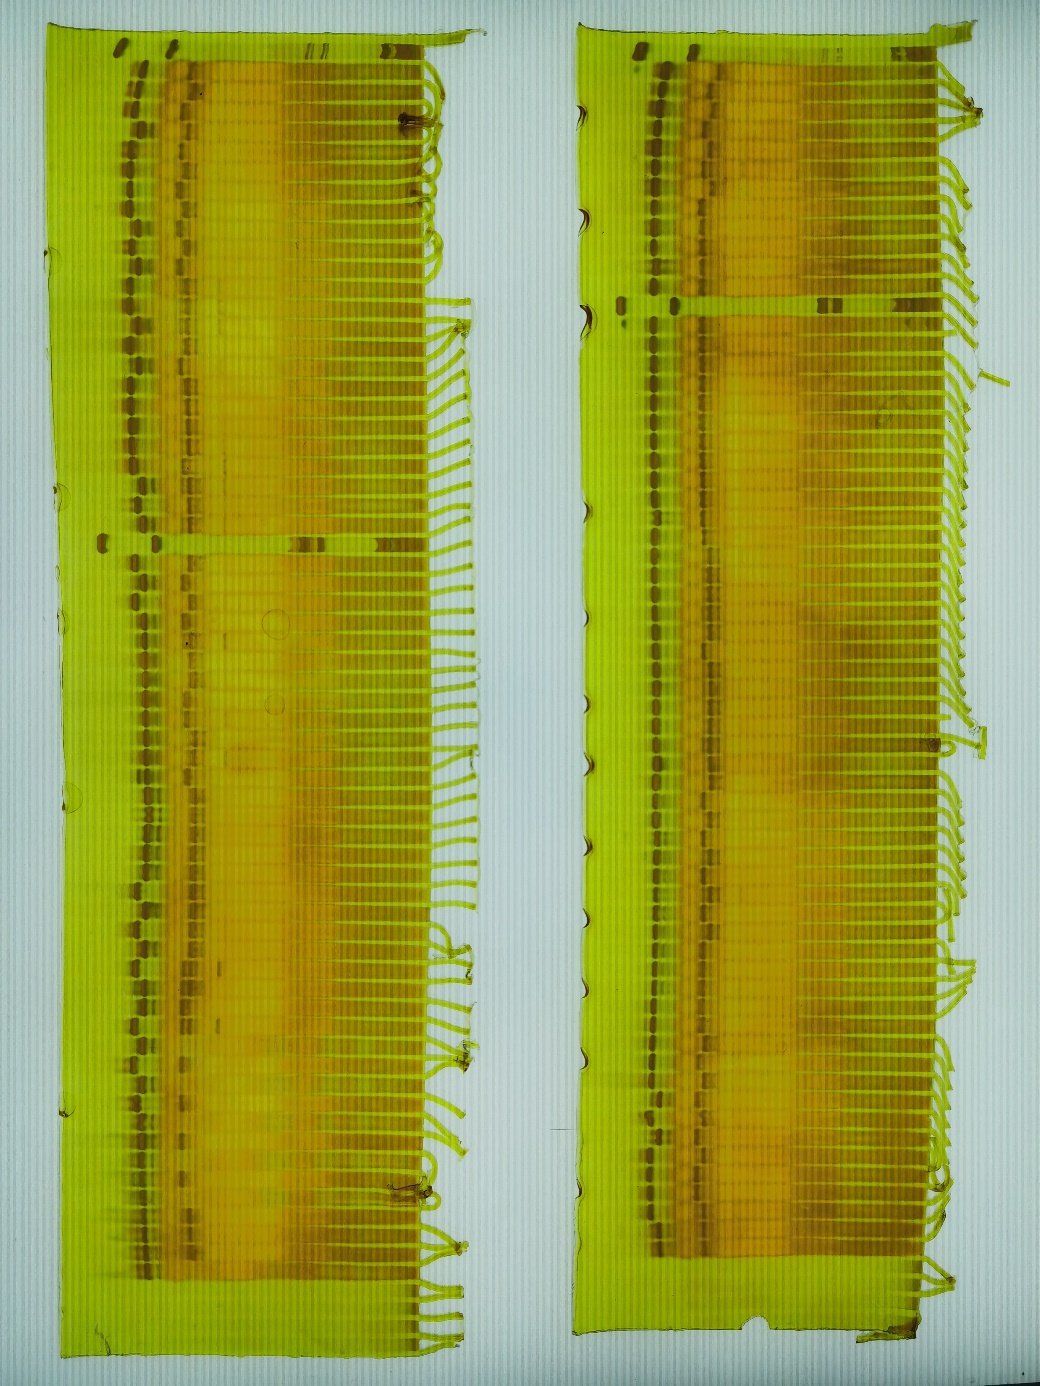


Fig2. SCM3indel-2 molecular marker gel (Two sample applications were conducted with a 20-minute interval in between.)
