# Supplementary material for: Molecular Marker-Assisted Pyramiding of SCM3, Wx, and BADH2 Genes for the Development of High-Yield, Superior-Quality, and Lodging-Resistant Rice Varieties
Source: Research Square preprint supplement (doi:10.21203/rs.3.rs-6845239/v1), 2025-06-17
Supplement: Supplementary file 2 [file 963d02d3977d7af9aa04639f.xlsx]

## Sheet: Table S1
Table S1. The primer information used in this study.
Primer name	Forward primer (5'-3')
SCM3indel-2F	GCTGCCTGCCTCCTAA
SCM3indel-2R	TTGGTTGATGCTTGGTCT
SCM3_k_28430214_F	AGGATCAGTGGGAGCTCGG
SCM3_k_28430214_Rc	GAAGGTGACCAAGTTCATGCTGGAGTTCGATCTTAGTGCCGTAC
SCM3_k_28430214_Ra	GAAGGTCGGAGTCAACGGATTGGAGTTCGATCTTAGTGCCGTAA

## Sheet: Table S2
Table S2． Characterization of lodging resistance and yield related traits of 78 rice germplasm resources.
bh	Variety name	Genotypes	ph_mean	ph_sd	BS_mean	BS_sd	LI_mean	LI_sd	CD2_mean	CD2_sd	CT2_mean	CT2_sd	IL2_mean	IL2_sd	SP_mean	SP_sd	TGW_mean	TGW_sd	GL_mean	GL_sd	GW_mean	GW_sd	PN_mean	PN_sd	YP_mean	YP_sd	NGP_mean	NGP_sd
HD3001	圣香69 SX69	SCM39311	100.811	2.15316	24.913	3.96861	32.1916	2.74058	6.09944	0.443174	0.936667	0.0969536	6.24444	1.37578	0.894	0.0183787	28.8862	1.6618	7.9952	0.147629	3.5596	0.0860881	7.1	1.1005	30.45	5.69937	198.9	26.6769
HD3002	连粳15 LJ15	SCM39311	84.1556	2.11549	15.0926	2.46943	34.0316	4.88146	5.07278	0.33944	0.698833	0.0882702	9.13333	1.58114	0.899	0.0159513	23.8758	1.04371	7.1253	0.0974144	3.378	0.0595166	8.6	1.17379	28.84	4.77335	174.8	22.3199
HD3003	丰软200 FR200	SCM39311	97.4667	2.2809	15.3861	2.69454	34.4183	6.69619	5.54056	0.23025	0.835556	0.0869786	9.52222	1.36086	0.887	0.0205751	27.5922	1.17333	8.5918	0.155322	3.2207	0.0787091	10.1	1.44914	35.26	6.79562	186.4	30.3762
HD3004	天丰345 TF345	SCM39311	94.9667	2.13249	25.746	3.65868	28.875	2.52594	5.55278	0.180643	0.844278	0.0365762	7.32222	0.96278	0.856	0.017127	23.1837	1.34408	7.5793	0.111173	3.3354	0.0802347	9.5	1.77951	35.39	6.31567	213.1	23.4968
HD3005	扬粳6048 YJ6048	SCM39311	95.3444	2.42647	15.1147	2.53574	45.8784	8.58938	5.28056	0.296231	0.712778	0.110937	9.2	1.20623	0.906	0.0150555	28.934	1.23978	7.8069	0.165984	3.5391	0.0573032	8.2	1.61933	37.24	8.01543	196.3	23.5374
HD3006	沪早粳192 HZJ192	SCM39311	97.8222	2.2857	12.9363	1.62689	46.0936	4.59799	5.05611	0.400178	0.735	0.0834416	6.24444	1.05961	0.887	0.0211082	25.4747	1.09604	7.8451	0.0758734	3.2574	0.0803329	9.7	1.63639	31.55	5.97499	193.7	31.5667
HD3007	润扬稻2007 RYD2007	SCM39311	96.8778	2.43915	33.1989	3.30364	28.2414	3.34436	6.01222	0.473986	0.975556	0.0872656	8.12222	1.22758	0.831	0.0508702	26.8591	1.39704	7.8992	0.0732512	3.5569	0.0833113	5.7	1.05935	24.13	3.9939	196.2	30.1323
HD3008	泗稻20 SD20	SCM39311	103.256	3.0013	20.4193	2.46425	42.7465	4.27855	5.82	0.45412	0.969444	0.110946	7.06667	1.04163	0.897	0.0416467	29.2805	0.956762	8.825	0.237556	3.4161	0.0977758	9.7	1.1595	39	5.1149	186	30.133
HD3009	泗稻307 SD307	SCM39311	102.433	2.39896	17.2597	2.38249	46.606	4.87152	5.29833	0.396721	0.775	0.087714	7.81111	1.40307	0.895	0.0201384	26.9527	1.54528	8.6438	0.131166	3.302	0.0727797	8.8	1.47573	36.7	6.01517	183.1	16.7096
HD3010	淮6728 H6728	SCM39311	101.1	1.82551	22.8692	2.95999	41.8177	3.97979	5.49778	0.55345	0.868333	0.19623	9.64444	0.961914	0.891	0.0218327	23.9864	1.13124	7.4967	0.161165	3.4616	0.078476	7.3	1.41814	28.71	5.6959	245.7	26.7376
HD3011	淮698 H698	SCM39311	99.0889	3.48297	25.064	3.5981	33.8212	3.6776	5.50056	0.316795	0.859444	0.138145	7.04444	2.00132	0.831	0.0296086	22.9875	0.797018	7.5105	0.0847064	3.2784	0.066244	6.1	0.737865	24.92	3.42695	221.5	20.4953
HD3012	武9437 W9437	SCM39311	100.378	2.19304	19.3031	2.25349	39.0343	4.8422	5.07778	0.344974	0.869444	0.11162	10.6222	1.03535	0.847	0.0262679	25.3658	1.24921	7.858	0.0935771	3.3875	0.112549	6.3	0.674949	24.7	3.12765	216.1	35.1835
HD3013	扬产93033 YC93033	SCM39311	111.189	1.77936	26.9636	2.55277	50.6455	3.48893	6.04228	0.364276	0.837778	0.0649573	9.17778	1.34608	0.925	0.0135401	26.2337	0.490878	8.1358	0.119563	3.527	0.0731604	7.3	1.63639	55.429	15.3225	297.5	46.3831
HD3078	扬产糯1号	SCM39311	119.667	5.01273	28.2808	3.88105	56.3531	4.10989	6.10944	0.363881	0.869444	0.136163	8.63333	1.3351	0.895	0.0184089	28.5755	0.951347	8.3978	0.118653	3.6825	0.0744062	7.2	1.81353	36.54	7.76763	261.2	36.3404
HD3014	金粳稻7165 JJD7165	SCM3NPB	85.9889	2.45481	16.2901	2.54371	36.753	4.61133	5.74722	0.442155	0.807778	0.0738288	10.3444	0.801734	0.868	0.0456557	26.5321	2.80917	7.606	0.135631	3.6097	0.150553	7.2	1.47573	25.79	4.86174	159.7	35.581
HD3015	连20813 L20813	SCM3NPB	92.5111	2.38718	12.7062	1.6445	42.9501	6.62301	4.95222	0.587533	0.787778	0.08408	12.0778	2.48233	0.881	0.0324722	23.7388	1.53726	7.6505	0.109589	3.2775	0.1192	6.2	1.0328	25.08	3.53233	209.9	34.9554
HD3016	南粳晴谷 NJQG	SCM3NPB	89.6	2.995	13.5559	2.8502	35.8844	4.24897	4.20722	0.604432	0.725556	0.0874802	9.16667	1.21037	0.869	0.0425441	30.4121	1.66039	8.3932	0.171924	3.284	0.0798679	7.2	0.918937	23.33	3.90898	155.6	53.1919
HD3017	松早香1号 SZX1	SCM3NPB	86.6667	1.56445	15.2358	2.37645	34.0708	5.48055	5.05111	0.291674	0.773889	0.0604554	7.28889	1.02767	0.868	0.0252982	27.0466	0.755737	8.9282	0.145463	3.101	0.0816333	7.4	0.966092	26.28	4.36343	143.5	16.3044
HD3018	连粳16135 LJ16135	SCM3NPB	95.1333	1.93778	19.3113	2.64437	35.9721	3.8814	5.43722	0.142415	0.915556	0.0508948	6.81111	0.868108	0.913	0.0170294	25.6527	0.925187	7.8422	0.1012	3.2474	0.0828938	6.8	0.788811	26.635	3.60494	175.6	34.9673
HD3019	南粳58 NJ58	SCM3NPB	95.3778	2.11174	18.8479	3.01785	37.6611	4.4806	5.25222	0.248396	0.907222	0.0844508	7.62222	1.75412	0.91	0.0221108	24.9629	0.986675	7.342	0.106463	3.4639	0.0660546	6.9	1.59513	27.89	5.06698	165.8	18.7368
HD3020	扬产1911 YC1911	SCM3NPB	94.5889	3.04362	21.0283	2.52969	41.7572	7.22564	5.705	0.410449	0.883333	0.114401	7.22222	1.08832	0.88	0.0188562	29.0633	1.11772	8.7152	0.120543	3.4252	0.0804982	6	0.666667	28.28	3.77501	211.8	22.165
HD3021	镇稻21 ZD21	SCM3NPB	87.7333	2.03777	16.4944	2.35198	36.4565	3.89554	4.67278	0.575907	0.693333	0.120546	11.15	0.904157	0.837	0.0163639	24.8557	1.50002	7.3849	0.152154	3.3794	0.0799391	6.4	0.843274	24.88	4.67328	167.1	42.5113
HD3022	沪早香软1 HZXR1	SCM3NPB	86.4778	3.22288	15.6724	3.05861	36.7802	6.90274	5.22333	0.318571	0.796111	0.0783732	5.63333	0.964365	0.886	0.0245855	25.0411	0.686961	7.2278	0.0779441	3.4346	0.0596568	8.1	1.37032	26.04	6.01058	115	20.7364
HD3023	天粳1908 TJ1908	SCM3NPB	90.5778	3.16693	15.62	1.8285	36.5773	3.63874	5.27222	0.279577	0.820556	0.0561496	7.98889	1.42342	0.912	0.0252982	24.3851	1.26689	7.9563	0.205226	3.1521	0.109868	6.5	1.35401	25.61	5.98284	215.8	41.1361
HD3024	徐稻9号 XD9	SCM3NPB	97.7889	2.39867	19.7607	2.82547	38.7499	4.15551	5.58222	0.108314	0.852778	0.0495676	7.72222	0.79652	0.842	0.0154919	22.9435	1.04625	7.797	0.121442	3.2609	0.0796847	7.4	1.50555	29.86	5.1782	258.8	27.0136
HD3025	华粳9050 HJ9050	SCM3NPB	97.9556	2.33512	17.0351	2.11176	46.2905	3.99401	5.74111	0.247105	0.895	0.0961119	7.52222	1.46439	0.901	0.0242441	28.1212	1.26041	7.5363	0.135182	3.4833	0.0455389	8.2	1.39841	36.85	7.46194	218.3	22.2763
HD3026	金粳368 JJ368	SCM3NPB	95.5222	1.6604	14.7732	3.32905	43.8068	7.02042	5.14389	0.242665	0.761667	0.0921954	9.65556	1.21049	0.856	0.0142984	24.1642	0.611795	7.8317	0.0651324	3.3405	0.0538852	6.3	0.823273	23.11	3.23366	194	16.1864
HD3027	连粳7号 LJ7	SCM3NPB	96.8556	1.18965	17.2817	2.97712	50.4594	9.53182	5.87667	0.439744	0.797778	0.0923347	7.7	1.47817	0.883	0.0188856	22.7896	1.49281	7.6368	0.111144	3.319	0.0570555	6.4	0.966092	31.45	6.62206	286.8	53.6031
HD3028	圣稻2620 SD2620	SCM3NPB	106.189	2.59492	13.9504	1.86758	48.9375	8.00904	4.91556	0.392161	0.687778	0.086245	8.08889	0.958442	0.887	0.0326769	24.406	0.876971	7.4493	0.13842	3.1738	0.0496919	7.3	0.674949	27.22	3.03857	207.9	33.6401
HD3029	扬产1921 YC1921	SCM3NPB	96.1889	1.99151	20.3566	3.87241	39.9566	4.68202	5.85944	0.282903	0.833333	0.0368273	8.12222	1.47121	0.869	0.0179196	25.119	1.00729	7.939	0.177227	3.4205	0.0882613	7.8	1.61933	35.51	7.82027	220.4	42.1036
HD3030	南粳5718 NJ5718	SCM3NPB	95.7778	2.3344	19.1703	2.30183	35.9057	5.84669	5.515	0.22966	0.803333	0.0874285	7.78889	1.36423	0.909	0.0202485	25.9309	1.25745	7.6856	0.134224	3.3325	0.07852	10.5	1.35401	40.56	5.83042	175.9	22.2833
HD3031	南粳7718 NJ7718	SCM3NPB	106.833	1.73277	16.9139	2.60265	53.936	6.35653	6.06	0.38708	0.895556	0.0549684	8.07778	1.38904	0.911	0.0213177	27.6275	1.24959	7.6035	0.176984	3.4333	0.0791567	7.4	1.3499	33.09	7.43781	198.4	35.756
HD3032	泰粳9307 TJ9307	SCM3NPB	93.2778	1.94536	11.8728	1.00312	49.2579	6.9461	5.27444	0.362133	0.726667	0.0492443	7.7	1.95576	0.886	0.0227058	27.2583	0.541035	7.5578	0.110402	3.5224	0.0446995	8.9	0.875595	35.86	3.78512	216.1	39.7309
HD3033	盐粳17172 YJ17172	SCM3NPB	96.0444	2.21873	23.0917	2.13465	32.4566	3.64368	5.69556	0.420189	0.760556	0.0976743	8.13333	1.5346	0.829	0.035103	26.7709	0.911701	8.9634	0.160813	3.2329	0.0324943	7.6	0.699206	31.36	3.46385	167.9	27.578
HD3034	苏1785 S1785	SCM3NPB	102.411	1.6213	17.9717	1.71063	47.3214	5.58811	5.49389	0.271406	0.786667	0.0395285	10.1667	1.54191	0.891	0.011005	25.2578	0.984262	7.412	0.120765	3.5899	0.0833273	9	0.942809	33.44	3.99533	197.7	29.3562
HD3035	扬产2022 YC2022	SCM3NPB	100.723	2.63342	18.5009	1.75491	42.5786	3.2332	4.99	0.293183	0.729444	0.0976103	8.02222	1.06745	0.892	0.0193218	24.3878	0.810047	7.4212	0.0929346	3.4835	0.0788716	8.1	0.994429	36.36	3.89991	196.5	75.0381
HD3036	扬粳5118 YJ5118	SCM3NPB	97.0444	2.3744	16.6406	2.92356	45.1864	8.77198	5.22444	0.378884	0.747222	0.109747	7.93333	1.11692	0.886	0.02319	28.3287	1.22828	7.6067	0.167328	3.5658	0.107035	8.3	0.948683	33.16	4.24897	185	40.387
HD3037	淮700 H700	SCM3NPB	111.333	1.96723	18.7344	2.60281	50.2146	5.59037	5.79444	0.420732	0.864444	0.114931	7.95556	1.17485	0.886	0.0227058	28.4082	0.881421	7.7806	0.0786754	3.4707	0.0571471	8.3	1.1595	37.64	4.58941	220.8	43.3379
HD3038	南粳9308 NJ9308	SCM3NPB	101.889	2.28662	17.4717	3.27691	46.6338	6.55093	5.79111	0.513388	0.797056	0.109772	8.64444	1.27878	0.878	0.0278089	25.5652	1.65071	7.9199	0.213814	3.446	0.109036	9.7	0.823273	39.93	3.58548	211.6	37.857
HD3039	泰粳7206 TJ7206	SCM3NPB	99.7	2.61725	20.6862	3.64901	33.1884	3.04193	5.13222	0.39669	0.826111	0.0979087	7.88889	1.09367	0.894	0.0183787	27.3072	0.85704	7.4451	0.0661504	3.5047	0.0364937	7.5	0.849837	32.08	4.73798	164.6	11.9276
HD3040	扬辐粳11 YFJ11	SCM3NPB	104.189	2.14327	21.1369	2.92545	43.1376	5.93958	5.74389	0.378705	0.858889	0.0777326	7.91111	1.16667	0.87	0.0226078	25.2315	1.03576	8.5871	0.175758	3.2473	0.135072	8.1	1.19722	38.07	6.657	237.2	23.5268
HD3041	盐粳16号 YJ16	SCM3NPB	99.4444	1.82353	22.8217	3.39509	39.9696	3.79172	5.40944	0.370721	0.876111	0.0926613	7.68889	0.883805	0.895	0.023214	27.6224	1.1568	7.7434	0.100718	3.5397	0.0315033	9.6	1.26491	39.73	6.0707	191.2	40.3507
HD3042	南粳9108 NJ9108	SCM3NPB	99.4	2.85832	16.7608	2.30827	47.5819	5.47804	5.095	0.249737	0.783889	0.0617342	8.41111	1.34856	0.826	0.0183787	23.1779	0.918495	7.5679	0.150137	3.4819	0.0843741	9.4	0.966092	32.75	5.08882	201.8	25.7069
HD3043	南粳莹谷 NJYG	SCM3NPB	100.533	2.58457	17.2932	1.94135	43.7705	3.25375	5.035	0.153216	0.762222	0.0467113	7.51111	0.82226	0.875	0.0212132	25.7325	0.42175	7.5434	0.099113	3.3618	0.0704553	10.3	1.1595	41.49	5.50867	165.9	40.2781
HD3044	盐稻5152 YD5152	SCM3NPB	95.8444	1.55492	16.9868	1.65823	40.2768	3.52896	5.01667	0.1329	0.710556	0.0485054	9.24444	1.80701	0.856	0.0236643	23.2913	1.20251	7.9117	0.18839	3.5668	0.0963879	7.7	0.823273	34.13	4.39723	179.9	14.2005
HD3045	镇稻4709 ZD4709	SCM3NPB	98.1111	2.69743	16.4127	1.94521	45.1242	6.52249	5.14111	0.143674	0.716778	0.0971581	8.2	1.47054	0.864	0.0377712	26.091	0.347185	7.7028	0.0741482	3.4255	0.0414494	10.2	1.13529	46.39	5.30879	177	31.5982
HD3046	宁粳7号 NJ7	SCM3NPB	101.311	2.41114	29.001	3.2642	33.8566	4.33195	6.02833	0.254362	0.875111	0.069463	7.85556	1.36941	0.861	0.0196921	22.8517	1.02367	7.5692	0.0946958	3.3237	0.100159	8.8	0.918937	35.59	4.79825	231	63.0115
HD3047	农粳1402 NJ1402	SCM3NPB	95.5444	1.33427	21.1363	2.31793	35.9377	3.15641	5.19722	0.230246	0.795556	0.07312	7.24444	1.58596	0.851	0.0185293	24.4129	1.03615	7.3869	0.101806	3.4064	0.0654492	7.4	0.966092	29.32	3.8189	193.1	14.5178
HD3048	泗稻301 SD301	SCM3NPB	107.478	1.19455	26.9288	2.29976	37.8644	3.8031	5.755	0.306094	0.913333	0.0728869	9.14444	2.00506	0.823	0.0205751	26.3072	1.31965	8.7944	0.173819	3.3049	0.0910597	7.9	1.19722	34.31	3.54415	221.7	11.795
HD3049	苏秀852 SX852	SCM3NPB	125.311	2.12629	20.8632	2.12669	54.4284	4.60411	5.31722	0.514612	0.827778	0.105774	9.92222	1.76549	0.882	0.0175119	25.044	1.47526	8.3193	0.208383	3.2639	0.204758	8.6	0.843274	32.66	4.80699	225.7	32.1699
HD3050	泰粳7359 TJ7359	SCM3NPB	102.856	1.86555	19.8678	2.4747	38.9674	3.9012	5.20167	0.318934	0.911111	0.0766395	9.17778	1.39354	0.848	0.0370585	25.0959	0.317659	7.3729	0.0758631	3.4501	0.0680497	9	1.1547	38.63	5.91665	179.6	49.7375
HD3051	皖垦粳1514 WKJ1514	SCM3NPB	108.256	1.67191	22.6657	2.65369	46.4162	5.3157	5.70111	0.17496	0.8	0.141907	11.0667	0.932738	0.876	0.0195505	27.8873	0.996073	7.7763	0.101411	3.5051	0.0711765	7.4	0.699206	32.97	4.61641	233.7	34.2833
HD3052	盐稻83006 YD83006	SCM3NPB	105.168	2.03411	15.4969	2.13056	54.0448	4.98685	5.28333	0.132406	0.708333	0.0678233	8.58889	1.66316	0.882	0.0304777	24.4548	0.910496	8.2003	0.124593	3.1333	0.0638471	7.9	0.737865	31.46	3.73964	175.1	20.9574
HD3053	盐粳15号 YD15	SCM3NPB	94.8667	1.94872	16.2198	2.30842	45.8853	4.75431	5.41722	0.506119	0.777222	0.0680584	7.14444	0.54569	0.873	0.0125167	27.5219	1.04205	7.8907	0.143599	3.4904	0.0406836	7.7	0.948683	33.71	5.32384	203.1	28.3331
HD3054	宁香粳9号 NXJ9	SCM3NPB	102.089	2.15606	17.2248	0.936896	44.4127	3.7702	5.245	0.258964	0.856111	0.16095	10.8556	1.22792	0.801	0.0390014	24.6297	0.675065	7.7931	0.0911866	3.4332	0.0971526	9.4	1.17379	35.75	4.90561	161.2	34.4925
HD3055	武香粳113 WXJ113	SCM3NPB	101.389	2.84976	18.2187	1.59101	42.6428	4.6482	4.98056	0.279312	0.766111	0.0760254	7.55556	0.79861	0.887	0.0141814	20.6129	0.684954	6.9828	0.141262	3.379	0.146816	7.3	0.674949	24.3	2.94128	217.1	31.3491
HD3056	皖垦粳11036 WKJ11036	SCM3NPB	101.5	2.78971	19.274	2.33268	43.0173	4.02219	4.93833	0.319619	0.767778	0.109119	10.3333	0.864581	0.922	0.0139841	28.0595	1.38002	8.2314	0.0914138	3.0896	0.0514807	9	0.816497	30.14	4.0327	200.6	24.6856
HD3057	武香粳968 WXJ968	SCM3NPB	107.933	2.02608	19.9908	1.68946	42.1681	4.39225	5.30722	0.279252	0.822778	0.0719423	7.45556	0.682113	0.888	0.0234758	28.4181	1.27002	7.4574	0.102949	3.5196	0.0317917	7.9	1.72884	30.16	9.00533	194.1	29.1565
HD3058	镇稻668 ZD668	SCM3NPB	106.767	1.80831	18.7306	1.91757	44.4517	3.38512	5.41567	0.511607	0.785556	0.0956048	9.14444	1.54281	0.9	0.0182574	27.9907	1.14408	7.9479	0.0597317	3.4887	0.0462747	7.9	1.52388	30.87	6.12192	178.4	15.9318
HD3059	南粳518 NJ518	SCM3NPB	90.8444	3.45402	17.6573	3.14355	40.096	6.40073	5.28611	0.273836	0.898889	0.181879	6.83333	2.00624	0.888	0.0301109	28.6526	1.42656	7.737	0.111868	3.4757	0.071447	7.3	1.25167	31.15	5.81784	165.1	29.5464
HD3060	常粳16-9 CJ16-9	SCM3NPB	108.678	1.73694	17.0128	1.73487	48.9683	6.0881	5.16556	0.26393	0.851111	0.0479438	9.51111	1.43217	0.902	0.0122927	24.5637	1.07746	7.1603	0.139417	3.1987	0.0492388	7.1	0.994429	26.25	5.57479	238.2	32.7814
HD3061	常农粳13号 CNJ13	SCM3NPB	104.889	2.14851	17.4797	1.69099	43.8918	5.87612	5.25056	0.320531	0.851667	0.0699553	9.37778	1.2194	0.896	0.0164655	22.4993	0.78232	7.1334	0.0781796	3.2204	0.0276092	7	1.49071	27.23	6.19427	263.9	22.0527
HD3062	扬粳7016 YJ7016	SCM3NPB	102.044	1.53795	19.5794	2.49002	41.5574	3.54051	5.16444	0.269901	0.748889	0.0777728	10.9333	1.10905	0.885	0.0195789	23.3855	0.938224	7.1977	0.108477	3.2909	0.0624917	6.9	0.567646	26.43	3.59074	227.8	16.7385
HD3063	镇稻6728 ZD6782	SCM3NPB	95.15	1.39591	18.4127	1.83192	38.284	3.59813	4.95444	0.330118	0.706667	0.0934077	10.0111	0.797566	0.923	0.0258414	27.0601	1.88413	7.379	0.104372	3.2583	0.0342249	7.88889	0.927961	31.89	5.8641	172	30.9372
HD3064	南粳56 NJ56	SCM3NPB	99.7033	2.75261	23.8739	1.48949	34.8714	3.1857	5.32667	0.517929	0.831667	0.0961119	7.97778	0.805881	0.878	0.0168655	23.9898	1.77841	7.3013	0.124769	3.2434	0.0576198	7	0.942809	26.48	4.76067	224.9	46.2804
HD3065	宁香粳11 NXJ11	SCM3NPB	101.444	2.29843	20.3983	1.53772	41.905	4.00736	5.30056	0.327533	0.882778	0.0670872	8.01111	1.45038	0.936	0.0126491	24.0876	0.658019	7.5097	0.238837	2.9825	0.096783	6.4	1.26491	26.53	4.11151	246.7	28.4177
HD3066	皖垦粳4618 WKJ4618	SCM3NPB	100.822	2.32797	18.7511	1.86742	44.1963	4.94309	5.03667	0.445835	0.722778	0.106393	10.1778	1.52625	0.917	0.0216282	29.8025	0.769749	7.5642	0.0895368	3.4532	0.036178	9.5	0.849837	40.72	4.9123	208	33.4996
HD3067	丰香粳968 FXJ968	SCM3NPB	105.089	3.22508	16.8524	2.20877	50.4037	6.17112	5.18333	0.254067	0.816111	0.101667	10.5	1.38744	0.905	0.0158114	28.6359	1.37055	7.485	0.0898072	3.5059	0.0426105	7.7	1.82878	31.92	7.66693	199.8	15.6688
HD3068	宁3818 N3818	SCM3NPB	103.844	1.92166	18.917	1.76087	43.5498	2.06599	5.26222	0.318121	0.723889	0.0400607	10.4778	0.8408	0.867	0.0188856	26.588	1.34466	7.8561	0.123985	3.641	0.0784616	7	1.05409	29.04	5.93674	207.1	34.8057
HD3069	南粳晶谷 NJJG	SCM3NPB	103.211	2.00901	16.4746	1.41573	55.4545	7.18152	5.66556	0.29406	0.842222	0.0719423	9.56667	1.25897	0.858	0.0122927	26.5808	0.855864	7.5286	0.152518	3.6165	0.0580828	6.5	0.971825	27.12	3.85855	183.6	20.5707
HD3070	武671 W671	SCM3NPB	97.6111	2.10026	14.6048	1.52526	51.1168	4.84518	4.78056	0.345601	0.607667	0.0929193	8.08889	0.868108	0.888	0.0289828	28.5278	1.78652	7.9169	0.0874864	3.5306	0.0407518	7.3	0.948683	29.92	5.72515	173.5	22.2573
HD3071	武香粳5245 WXJ5245	SCM3NPB	104.289	3.24286	16.0624	1.68617	50.1216	6.03348	5.51	0.279799	0.802222	0.0446592	9.77778	1.70204	0.909	0.0137032	23.7985	0.770804	8.0985	0.387924	3.7139	0.167673	8.4	1.42984	33.844	5.48842	224.6	32.3014
HD3072	武香软7375 WXR7375	SCM3NPB	104.967	3.36229	17.6697	2.23597	50.5085	6.04413	5.23611	0.461389	0.85	0.126343	9.37778	1.40693	0.9	0.0124722	27.7007	0.814169	7.5062	0.071414	3.5803	0.0673301	8.3	0.948683	31.34	6.84352	223.4	25.1891
HD3073	南粳3908 NJ3908	SCM3NPB	105.822	1.53523	18.3529	2.6704	52.4682	5.19799	5.81167	0.42032	0.877778	0.066149	9.55556	1.7973	0.88	0.02	28.575	0.894456	7.7932	0.122998	3.6117	0.0356528	7.6	0.966092	32.83	5.5098	185.5	21.0568
HD3074	常香粳1813 CXJ1813	SCM3NPB	102.222	1.97217	19.3398	1.75497	41.3347	5.42157	5.12444	0.188952	0.653889	0.082302	10.3556	0.972254	0.864	0.021187	21.918	1.33322	7.5771	0.116454	3.371	0.0829176	7	1.05409	29.76	6.55307	242.4	32.7353
HD3075	武运粳31 WYJ31	SCM3NPB	101.067	1.85135	21.893	2.68151	43.3354	3.78457	5.69278	0.390753	0.788889	0.0763535	8.16667	1.4824	0.863	0.0290784	26.9056	1.10223	7.6131	0.0736651	3.591	0.0606025	6.5	0.707107	25.48	5.29272	201.7	24.9891
HD3076	沪软1212 HR1212	SCM3NPB	118.611	6.19686	28.2808	3.88105	57.0355	5.48766	6.10944	0.363881	0.869444	0.136163	8.63333	1.3351	0.884	0.0263312	23.7964	0.812357	7.9073	0.150324	3.2833	0.0534687	8.6	2.01108	28.82	6.0179	187.6	16.6547
HD3077	宁粳8号 NJ8	SCM3NPB	106.944	1.60866	19.9289	1.24906	46.6474	4.60942	5.42611	0.477682	0.738889	0.0562793	9.48889	0.972682	0.878	0.0198886	27.1115	0.621441	7.6373	0.0385747	3.588	0.0251573	8.5	1.08012	37.9	6.01221	200	34.6057

## Sheet: Table S3
Table S3. Comparisons of agronomic traits among the rice germplasm resources with different SCM3 alleles.
Phenotype	Overall	SCM39311	SCM3NPB	p-value*
ph_mean (cm)	100.264	100.325	100.25	0.9244
ph_sd	7.52634	8.2138	7.37475
F_mean (N)	19.1038	21.6105	18.5554	1.067e-06
F_sd	4.64531	6.47484	3.93897
LI_mean	42.823	40.0539	43.4288	0.0002221
LI_sd	8.18876	9.34774	7.79142
CD2_mean (mm)	5.38574	5.56862	5.34573	1.876e-05
CD2_sd	0.499369	0.521281	0.485808
CT2_mean (mm)	0.808266	0.841968	0.800893	0.001462
CT2_sd	0.114145	0.133117	0.108299
IL2_mean (mm)	8.63454	8.27063	8.71415	0.01316
IL2_sd	1.80557	1.80187	1.79813
NGP_mean	201.977	212.179	199.745	0.002566
NGP_sd	43.8593	43.6509	43.6214
SP_mean	0.880333	0.8815	0.880078	0.6761
SP_sd	0.034394	0.0369702	0.0338295
TGW_mean (g)	25.9343	26.2991	25.8545	0.04928
TGW_sd	2.38215	2.41774	2.36872
GL_mean (mm)	7.78235	7.97931	7.73927	2.76e-07
GL_sd	0.455684	0.492241	0.435977
GW_mean (mm)	3.40287	3.42159	3.39878	0.1196
GW_sd	0.168769	0.152884	0.171888
PN_mean	7.85879	7.97143	7.83412	0.4301
PN_sd	1.58741	1.93023	1.50257
YP_mean (g)	31.9646	33.4899	31.6309	0.04211
YP_sd	7.78573	10.2124	7.11269
*Welch Two Sample t-test

## Sheet: Table S4
Table S4. Characterization of lodging resistance of 44 44 F6 progeny lines and their parental lines
BH	ph_mean	ph_sd	F_mean	F_sd	LI_mean	LI_sd	CD2_mean	CD2_sd	CT2_mean	CT2_sd	IL2_mean	IL2_sd	PN_mean	PN_sd
24HD088	104.14	1.5582	18.1422	0.75227	54.29	3.33993	6.102	0.154822	0.832	0.0580517	8.12	0.816701	6.6	0.894427
24HD090	88.22	3.65062	19.2128	1.5661	33.504	3.09367	5.236	0.574047	0.69	0.0538516	8.14	1.55981	5.6	0.547723
24HD099	95.62	0.828855	17.186	0.964727	37.802	1.42301	5.558	0.0756307	0.636	0.0350714	6.84	0.60663	9.4	0.547723
24HD100	101.12	1.8431	40.6062	2.40436	37.066	2.14202	6.714	0.0559464	1.082	0.0589067	5.88	0.501996	7.2	0.447214
24HD112	99.3	4.33128	27.7244	2.09489	38.182	4.11468	5.806	0.516846	0.988	0.0697854	5.94	1.11714	7.4	0.894427
24HD123	93.98	2.18105	19.2864	2.42782	38.884	2.85265	6.108	0.485767	0.774	0.095289	8.22	1.4025	6.6	1.14018
24HD124	93.8	3.15198	19.0806	2.03579	38.132	3.94851	5.36	0.330832	0.644	0.0789303	10.6	1.52151	6.4	0.547723
24HD127	92.98	2.48837	28.9084	2.67382	25.848	2.46792	5.448	0.375327	0.856	0.0502991	7.42	1.10995	6.8	0.447214
24HD134	100.06	2.58902	33.0972	1.40995	37.474	1.93253	5.468	0.134981	0.728	0.0286356	6.78	0.481664	10.2	0.83666
24HD135	103.54	1.37949	27.9308	1.1749	39.012	2.11475	5.306	0.243885	0.812	0.056745	6.42	0.396232	6	0.707107
24HD136	85.98	1.65288	16.5366	1.57208	33.65	3.57558	5.02	0.365034	0.636	0.10015	9.78	1.13004	6.4	0.547723
24HD142	101.14	1.73003	28.2008	2.05123	35.792	1.75837	6.16	0.228364	0.938	0.0443847	7.94	1.84201	7	0.707107
24HD146	103.1	2.11778	30.1908	2.39227	42.532	4.6326	6.184	0.161338	0.962	0.119457	6.5	0.764853	6.6	0.547723
24HD156	100.96	1.54208	23.2016	2.62155	42.892	3.11122	6.808	0.195883	0.782	0.0637966	6.98	0.931128	6.4	0.547723
24HD185	95.9	0.927362	20.931	1.30523	45.444	3.3211	6.682	0.22786	0.928	0.0672309	5.46	0.482701	7.2	0.83666
24HD188	102.3	1.35462	22.1716	1.58325	45.236	1.90106	5.526	0.141174	0.602	0.0248998	5.88	0.402492	7.6	0.547723
WXJ5245	98.06	1.75014	19.1862	1.50438	41.102	2.65288	5.658	0.233388	0.774	0.0472229	6.24	0.384708	8.6	0.547723
YC93033	100.58	1.66042	40.6428	1.15989	36.386	1.02805	6.672	0.0432435	0.99	0.03937	6.18	0.589067	7.6	0.547723
24HD207	99.64	1.11937	26.0112	1.22541	37.476	1.34931	6.178	0.192016	0.95	0.0612372	5.68	0.511859	7.2	0.83666
24HD208	100.18	1.64225	26.1054	1.47445	37.554	1.6264	5.56	0.193391	0.838	0.0449444	6.38	1.02567	7.8	0.447214
24HD212	94.54	2.67451	26.898	2.9662	30.554	2.93023	6.612	0.425641	1.07	0.131529	6.08	1.30843	7	0.707107
24HD219	87.12	0.884308	20.7664	1.0452	40.384	2.44084	6.61	0.261725	0.832	0.0715542	6.78	0.766159	7.2	0.447214
24HD220	109.84	1.69499	40.0088	1.31318	40.996	2.11836	6.646	0.10761	0.934	0.0577062	6	0.927362	5.6	0.547723
24HD331	92.02	1.18195	13.9406	2.0955	45.524	5.97844	5.068	0.272984	0.63	0.0604152	5.82	0.746324	9.6	0.547723
24HD333	97.18	2.4366	18.4764	2.35263	41.694	4.54459	5.628	0.231236	0.77	0.103682	6.36	1.36125	8.2	0.447214
24HD340	93	6.1131	24.83	3.44603	36.068	2.78055	5.876	0.686171	1.014	0.101637	6.72	1.26965	6.4	0.547723
24HD356	107.66	1.15022	22.3414	1.37799	55.82	3.65847	6.498	0.0722496	1	0.0951315	6.2	0.717635	6.4	0.547723
24HD362	115.08	1.29112	34.1322	1.54208	53.776	2.72286	6.782	0.0376829	0.922	0.0426615	5.34	0.554977	9.8	0.447214
24HD364	107.36	2.74736	25.5102	1.69135	44.36	5.42968	6.352	0.5743	1.038	0.128919	7.02	1.69027	8.2	0.447214
24HD365	98.44	3.09322	24.744	1.93966	39.432	4.55041	5.95	0.334664	0.988	0.0549545	7.46	0.939681	6.6	0.894427
24HD388	97.58	1.19457	22.3312	2.25954	41.728	2.62245	5.836	0.169794	0.742	0.0408656	9.08	0.268328	8.2	0.83666
24HD390	93.22	1.58651	15.766	1.38936	45.618	3.29968	5.322	0.221968	0.82	0.0681909	10	1.02713	8.2	0.83666
24HD399	100.72	1.17983	23.0156	1.10304	39.1	2.54935	5.5	0.199875	0.72	0.0282843	6.62	0.630079	6.6	0.547723
24HD400	103.2	2.39792	41.0414	1.86453	35.984	1.53203	6.686	0.070214	1.044	0.0646529	5.66	0.61887	8.6	0.547723
24HD419	99.32	3.12522	17.4134	2.46704	42.058	3.70736	4.608	0.5342	0.662	0.0432435	11.88	1.67839	7.2	0.447214
24HD427	104.46	1.77989	23.8498	3.14142	51.528	10.5331	6.526	0.202929	1.002	0.0491935	6.58	0.443847	8.2	0.83666
24HD448	109.7	1.35462	30.1118	4.11083	44.49	3.20193	6.918	0.265368	1.036	0.0795613	7.3	1.16404	6.6	0.547723
24HD463	92.06	1.29923	37.11	1.53361	31.51	1.48459	5.738	0.0834865	0.902	0.0476445	6.76	0.427785	6.6	0.547723
24HD464	96.94	0.971082	28.763	1.08533	38.792	1.67899	5.588	0.0268328	0.77	0.03	6.3	0.324037	11.2	0.447214
